# Supplementary material for: Spatial and temporal behavioural responses of wild cattle to tropical forest degradation
Source: PLoS One. 2018 Apr 12;13(4):e0195444. doi: 10.1371/journal.pone.0195444 (PMC5896964; doi:10.1371/journal.pone.0195444)
Supplement: S2 Table — (CSV) [file pone.0195444.s003.csv]

Forest	Season	Month	Hour	Period	Frequency	Temp	Activity_budget	Grazing	Travel	Other	Log_road	Open_area	Forest_trail	Active_road
MBCA	Wet	Dec.Jan	H01	Nocturnal	3	22	136	117	19	0	4	132	0	0
MBCA	Wet	Dec.Jan	H02	Nocturnal	1	21	4	21	0	0	0	21	0	0
MBCA	Wet	Dec.Jan	H03	Crepuscular	3	23	87	78	9	0	9	78	0	0
MBCA	Wet	Dec.Jan	H04	Diurnal	1	22	2	0	2	0	2	0	0	0
MBCA	Wet	Dec.Jan	H05	Diurnal	2	25	14	0	14	0	4	10	0	0
MBCA	Wet	Dec.Jan	H06	Diurnal		NA	0	0	0	0	0	0	0	0
MBCA	Wet	Dec.Jan	H07	Diurnal	1	27	1	0	1	0	1	0	0	0
MBCA	Wet	Dec.Jan	H08	Diurnal		NA	0	0	0	0	0	0	0	0
MBCA	Wet	Dec.Jan	H09	Diurnal	2	26	3	0	3	0	1	0	2	0
MBCA	Wet	Dec.Jan	H10	Crepuscular	1	27	13	13	0	0	0	13	0	0
MBCA	Wet	Dec.Jan	H11	Nocturnal		NA	0	0	0	0	0	0	0	0
MBCA	Wet	Dec.Jan	H12	Nocturnal	2	23	7	6	1	0	0	7	0	0
MBCA	Wet	Feb.Mar	H01	Nocturnal	3	21	11	6	5	0	4	0	0	1
MBCA	Wet	Feb.Mar	H02	Nocturnal	6	22	185	145	40	0	2	145	0	37
MBCA	Wet	Feb.Mar	H03	Crepuscular	2	23	24	1	23	0	1	23	0	0
MBCA	Wet	Feb.Mar	H04	Diurnal	4	22	11	7	4	0	10	0	0	1
MBCA	Wet	Feb.Mar	H05	Diurnal	1	25	1	0	1	0	0	0	1	0
MBCA	Wet	Feb.Mar	H06	Diurnal		NA	0	0	0	0	0	0	0	0
MBCA	Wet	Feb.Mar	H07	Diurnal		NA	0	0	0	0	0	0	0	0
MBCA	Wet	Feb.Mar	H08	Diurnal	1	25	3	0	1	0	0	0	1	0
MBCA	Wet	Feb.Mar	H09	Diurnal	2	30	7	0	1	6	1	0	6	0
MBCA	Wet	Feb.Mar	H10	Crepuscular	3	25	93	88	5	0	5	88	0	0
MBCA	Wet	Feb.Mar	H11	Nocturnal	4	24	63	0	63	0	2	0	0	61
MBCA	Wet	Feb.Mar	H12	Nocturnal	3	22	30	0	30	0	3	27	0	0
MBCA	Dry	Apr.May	H01	Nocturnal	3	22	232	232	0	0	0	232	0	0
MBCA	Dry	Apr.May	H02	Nocturnal	2	24	52	7	45	0	0	52	0	0
MBCA	Dry	Apr.May	H03	Crepuscular	3	22	90	33	57	0	0	33	0	57
MBCA	Dry	Apr.May	H04	Diurnal	8	24	145	44	6	95	56	89	0	0
MBCA	Dry	Apr.May	H05	Diurnal	1	24	3	0	0	3	0	0	3	0
MBCA	Dry	Apr.May	H06	Diurnal	1	24	3	3	0	0	3	0	0	0
MBCA	Dry	Apr.May	H07	Diurnal	1	29	3	3	0	0	3	0	0	0
MBCA	Dry	Apr.May	H08	Diurnal	2	29	16	12	4	0	16	0	0	0
MBCA	Dry	Apr.May	H09	Diurnal	2	33	56	53	0	3	0	0	3	53
MBCA	Dry	Apr.May	H10	Crepuscular	6	27	9	0	9	0	7	0	1	1
MBCA	Dry	Apr.May	H11	Nocturnal	6	24	259	34	23	0	2	157	0	0
MBCA	Dry	Apr.May	H12	Nocturnal	1	NA	34	34	0	0	0	34	0	0
MBCA	Dry	Jun.Jul	H01	Nocturnal	1	22	1	0	1	0	1	0	0	0
MBCA	Dry	Jun.Jul	H02	Nocturnal	3	23	10	0	10	0	2	0	0	8
MBCA	Dry	Jun.Jul	H03	Crepuscular	2	22	8	0	8	0	1	0	0	7
MBCA	Dry	Jun.Jul	H04	Diurnal	4	21	11	9	2	0	10	0	1	0
MBCA	Dry	Jun.Jul	H05	Diurnal	3	24	129	127	2	0	129	0	0	0
MBCA	Dry	Jun.Jul	H06	Diurnal	2	25	3	0	3	0	3	0	0	0
MBCA	Dry	Jun.Jul	H07	Diurnal		NA	0	0	0	0	0	0	0	0
MBCA	Dry	Jun.Jul	H08	Diurnal		NA	0	0	0	0	0	0	0	0
MBCA	Dry	Jun.Jul	H09	Diurnal	1	26	1	0	1	0	1	0	0	0
MBCA	Dry	Jun.Jul	H10	Crepuscular	5	25	53	0	53	0	38	0	15	0
MBCA	Dry	Jun.Jul	H11	Nocturnal	1	21	1	0	1	0	1	0	0	0
MBCA	Dry	Jun.Jul	H12	Nocturnal	2	23	9	8	1	0	1	8	0	0
MBCA	Dry	Aug.Sep	H01	Nocturnal	1	23	2	0	2	0	2	0	0	0
MBCA	Dry	Aug.Sep	H02	Nocturnal	1	22	1	0	1	0	1	0	0	0
MBCA	Dry	Aug.Sep	H03	Crepuscular	1	20	1	1	0	0	0	1	0	0
MBCA	Dry	Aug.Sep	H04	Diurnal	4	22	32	5	27	0	2	25	0	5
MBCA	Dry	Aug.Sep	H05	Diurnal	2	22	2	0	2	0	2	0	0	0
MBCA	Dry	Aug.Sep	H06	Diurnal	1	23	1	0	1	0	1	0	0	0
MBCA	Dry	Aug.Sep	H07	Diurnal		NA	0	0	0	0	0	0	0	0
MBCA	Dry	Aug.Sep	H08	Diurnal	1	25	1	0	1	0	1	0	0	0
MBCA	Dry	Aug.Sep	H09	Diurnal	3	26	6	0	6	0	6	0	0	0
MBCA	Dry	Aug.Sep	H10	Crepuscular	2	27	2	0	2	0	2	0	0	0
MBCA	Dry	Aug.Sep	H11	Nocturnal		NA	0	0	0	0	0	0	0	0
MBCA	Dry	Aug.Sep	H12	Nocturnal	1	23	1	0	1	0	0	0	0	1
MBCA	Wet	Oct.Nov	H01	Nocturnal	5	23	121	72	14	35	35	18	0	68
MBCA	Wet	Oct.Nov	H02	Nocturnal	3	22	76	74	2	0	2	74	0	0
MBCA	Wet	Oct.Nov	H03	Crepuscular	7	23	163	116	46	0	45	116	0	1
MBCA	Wet	Oct.Nov	H04	Diurnal	4	22	22	6	16	0	7	0	0	15
MBCA	Wet	Oct.Nov	H05	Diurnal		NA	0	0	0	0	0	0	0	0
MBCA	Wet	Oct.Nov	H06	Diurnal	1	24	4	0	4	0	0	0	0	4
MBCA	Wet	Oct.Nov	H07	Diurnal	1	27	1	0	1	0	1	0	0	0
MBCA	Wet	Oct.Nov	H08	Diurnal	1	33	1	0	1	0	0	1	0	0
MBCA	Wet	Oct.Nov	H09	Diurnal	1	25	29	25	4	0	1	25	3	0
MBCA	Wet	Oct.Nov	H10	Crepuscular	2	25	180	179	1	0	1	179	0	0
MBCA	Wet	Oct.Nov	H11	Nocturnal	4	24	130	125	5	0	5	125	0	0
MBCA	Wet	Oct.Nov	H12	Nocturnal	3	24	125	59	66	0	59	61	0	5
MFR	Wet	Dec.Jan	H01	Nocturnal		NA	0	0	0	0	0	0	0	0
MFR	Wet	Dec.Jan	H02	Nocturnal	3	22	86	85	1	0	0	86	0	0
MFR	Wet	Dec.Jan	H03	Crepuscular	6	23	127	127	0	0	0	127	0	0
MFR	Wet	Dec.Jan	H04	Diurnal	2	24	28	28	0	0	0	28	0	0
MFR	Wet	Dec.Jan	H05	Diurnal		NA	0	0	0	0	0	0	0	0
MFR	Wet	Dec.Jan	H06	Diurnal	1	26	4	4	0	0	0	4	0	0
MFR	Wet	Dec.Jan	H07	Diurnal		NA	0	0	0	0	0	0	0	0
MFR	Wet	Dec.Jan	H08	Diurnal		NA	0	0	0	0	0	0	0	0
MFR	Wet	Dec.Jan	H09	Diurnal	2	26	13	13	0	0	0	13	0	0
MFR	Wet	Dec.Jan	H10	Crepuscular		NA	0	0	0	0	0	0	0	0
MFR	Wet	Dec.Jan	H11	Nocturnal	2	24	71	71	0	0	0	71	0	0
MFR	Wet	Dec.Jan	H12	Nocturnal	2	24	20	20	0	0	0	20	0	0
MFR	Wet	Feb.Mar	H01	Nocturnal	2	23	23	18	5	0	0	23	0	0
MFR	Wet	Feb.Mar	H02	Nocturnal	3	22	68	10	58	0	0	68	0	0
MFR	Wet	Feb.Mar	H03	Crepuscular	6	23	36	3	33	0	0	36	0	0
MFR	Wet	Feb.Mar	H04	Diurnal	7	22	137	137	0	0	0	137	0	0
MFR	Wet	Feb.Mar	H05	Diurnal		NA	0	0	0	0	0	0	0	0
MFR	Wet	Feb.Mar	H06	Diurnal	2	28	75	75	0	0	5	70	0	0
MFR	Wet	Feb.Mar	H07	Diurnal		NA	0	0	0	0	0	0	0	0
MFR	Wet	Feb.Mar	H08	Diurnal	1	31	2	2	0	0	2	0	0	0
MFR	Wet	Feb.Mar	H09	Diurnal		NA	0	0	0	0	0	0	0	0
MFR	Wet	Feb.Mar	H10	Crepuscular	3	25	25	22	3	0	0	25	0	0
MFR	Wet	Feb.Mar	H11	Nocturnal	3	23	173	173	0	0	0	173	0	0
MFR	Wet	Feb.Mar	H12	Nocturnal		NA	0	0	0	0	0	0	0	0
MFR	Dry	Apr.May	H01	Nocturnal	6	24	102	30	72	0	17	85	0	0
MFR	Dry	Apr.May	H02	Nocturnal	4	23	27	22	2	3	5	22	0	0
MFR	Dry	Apr.May	H03	Crepuscular	11	23	214	209	5	0	5	209	0	0
MFR	Dry	Apr.May	H04	Diurnal	5	24	133	9	8	121	125	9	0	0
MFR	Dry	Apr.May	H05	Diurnal	1	25	7	0	7	0	7	0	0	0
MFR	Dry	Apr.May	H06	Diurnal	2	33	27	1	0	26	27	0	0	0
MFR	Dry	Apr.May	H07	Diurnal		NA	0	0	0	0	0	0	0	0
MFR	Dry	Apr.May	H08	Diurnal	1	32	10	0	0	10	10	0	0	0
MFR	Dry	Apr.May	H09	Diurnal	4	27	34	16	11	7	34	0	0	0
MFR	Dry	Apr.May	H10	Crepuscular	2	24	21	21	0	0	0	21	0	0
MFR	Dry	Apr.May	H11	Nocturnal	1	23	58	58	0	0	0	58	0	0
MFR	Dry	Apr.May	H12	Nocturnal	7	23	81	67	0	14	20	61	0	0
MFR	Dry	Jun.Jul	H01	Nocturnal	4	23	194	174	20	0	20	174	0	0
MFR	Dry	Jun.Jul	H02	Nocturnal	4	23	151	149	0	2	2	149	0	0
MFR	Dry	Jun.Jul	H03	Crepuscular	11	23	170	107	72	0	2	158	19	0
MFR	Dry	Jun.Jul	H04	Diurnal	9	23	100	62	30	8	1	99	0	0
MFR	Dry	Jun.Jul	H05	Diurnal	5	27	111	105	6	0	0	105	6	0
MFR	Dry	Jun.Jul	H06	Diurnal	2	29	39	37	2	0	0	37	2	0
MFR	Dry	Jun.Jul	H07	Diurnal	2	28	93	0	3	90	90	0	3	0
MFR	Dry	Jun.Jul	H08	Diurnal	5	31	24	15	8	1	3	15	0	6
MFR	Dry	Jun.Jul	H09	Diurnal	10	31	263	254	9	0	8	195	1	0
MFR	Dry	Jun.Jul	H10	Crepuscular	8	27	111	81	30	0	49	57	5	0
MFR	Dry	Jun.Jul	H11	Nocturnal	3	23	43	39	4	0	0	39	0	0
MFR	Dry	Jun.Jul	H12	Nocturnal	2	23	36	28	8	0	0	36	0	0
MFR	Dry	Aug.Sep	H01	Nocturnal	5	23	82	75	7	0	0	82	0	0
MFR	Dry	Aug.Sep	H02	Nocturnal	6	22	47	45	2	0	22	25	0	0
MFR	Dry	Aug.Sep	H03	Crepuscular	19	22	191	170	21	0	7	181	3	0
MFR	Dry	Aug.Sep	H04	Diurnal	12	23	163	99	64	0	49	111	3	0
MFR	Dry	Aug.Sep	H05	Diurnal	1	25	1	0	1	0	0	0	1	0
MFR	Dry	Aug.Sep	H06	Diurnal	1	28	13	0	0	1	0	0	1	0
MFR	Dry	Aug.Sep	H07	Diurnal	2	33	8	0	1	7	0	1	7	0
MFR	Dry	Aug.Sep	H08	Diurnal	1	28	18	0	0	18	0	0	18	0
MFR	Dry	Aug.Sep	H09	Diurnal	6	31	208	208	0	0	36	172	0	0
MFR	Dry	Aug.Sep	H10	Crepuscular	9	28	146	54	22	70	70	76	0	0
MFR	Dry	Aug.Sep	H11	Nocturnal	5	23	35	32	1	2	2	33	0	0
MFR	Dry	Aug.Sep	H12	Nocturnal	12	23	174	112	57	5	5	169	0	0
MFR	Wet	Oct.Nov	H01	Nocturnal	6	22	50	37	13	0	0	50	0	0
MFR	Wet	Oct.Nov	H02	Nocturnal	8	22	214	154	60	0	13	201	0	0
MFR	Wet	Oct.Nov	H03	Crepuscular	12	22	178	167	11	0	0	178	0	0
MFR	Wet	Oct.Nov	H04	Diurnal	9	23	130	105	25	0	41	89	0	0
MFR	Wet	Oct.Nov	H05	Diurnal	1	30	11	11	0	0	11	0	0	0
MFR	Wet	Oct.Nov	H06	Diurnal		NA	0	0	0	0	0	0	0	0
MFR	Wet	Oct.Nov	H07	Diurnal		NA	0	0	0	0	0	0	0	0
MFR	Wet	Oct.Nov	H08	Diurnal		NA	0	0	0	0	0	0	0	0
MFR	Wet	Oct.Nov	H09	Diurnal	5	27	96	70	26	0	5	91	0	0
MFR	Wet	Oct.Nov	H10	Crepuscular	7	25	43	39	4	0	6	37	0	0
MFR	Wet	Oct.Nov	H11	Nocturnal	4	24	47	47	0	0	0	47	0	0
MFR	Wet	Oct.Nov	H12	Nocturnal	8	24	140	140	0	0	19	121	0	0
TWR	Wet	Dec.Jan	H01	Nocturnal	1	23	5	0	5	0	5	0	0	0
TWR	Wet	Dec.Jan	H02	Nocturnal		NA	0	0	0	0	0	0	0	0
TWR	Wet	Dec.Jan	H03	Crepuscular		NA	0	0	0	0	0	0	0	0
TWR	Wet	Dec.Jan	H04	Diurnal		NA	0	0	0	0	0	0	0	0
TWR	Wet	Dec.Jan	H05	Diurnal		NA	0	0	0	0	0	0	0	0
TWR	Wet	Dec.Jan	H06	Diurnal		NA	0	0	0	0	0	0	0	0
TWR	Wet	Dec.Jan	H07	Diurnal		NA	0	0	0	0	0	0	0	0
TWR	Wet	Dec.Jan	H08	Diurnal		NA	0	0	0	0	0	0	0	0
TWR	Wet	Dec.Jan	H09	Diurnal		NA	0	0	0	0	0	0	0	0
TWR	Wet	Dec.Jan	H10	Crepuscular		NA	0	0	0	0	0	0	0	0
TWR	Wet	Dec.Jan	H11	Nocturnal		NA	0	0	0	0	0	0	0	0
TWR	Wet	Dec.Jan	H12	Nocturnal	1	24	2	0	2	0	2	0	0	0
TWR	Wet	Feb.Mar	H01	Nocturnal	1	22	37	0	37	0	0	37	0	0
TWR	Wet	Feb.Mar	H02	Nocturnal		NA	0	0	0	0	0	0	0	0
TWR	Wet	Feb.Mar	H03	Crepuscular	1	22	1	0	1	0	0	1	0	0
TWR	Wet	Feb.Mar	H04	Diurnal	1	22	10	1	0	0	0	1	0	0
TWR	Wet	Feb.Mar	H05	Diurnal		NA	0	0	0	0	0	0	0	0
TWR	Wet	Feb.Mar	H06	Diurnal		NA	0	0	0	0	0	0	0	0
TWR	Wet	Feb.Mar	H07	Diurnal	1	28	4	0	1	0	0	0	0	4
TWR	Wet	Feb.Mar	H08	Diurnal		NA	0	0	0	0	0	0	0	0
TWR	Wet	Feb.Mar	H09	Diurnal	1	25	16	0	16	0	0	16	0	0
TWR	Wet	Feb.Mar	H10	Crepuscular		NA	0	0	0	0	0	0	0	0
TWR	Wet	Feb.Mar	H11	Nocturnal		NA	0	0	0	0	0	0	0	0
TWR	Wet	Feb.Mar	H12	Nocturnal	1	24	36	36	0	0	0	36	0	0
TWR	Dry	Apr.May	H01	Nocturnal		NA	0	0	0	0	0	0	0	0
TWR	Dry	Apr.May	H02	Nocturnal		NA	0	0	0	0	0	0	0	0
TWR	Dry	Apr.May	H03	Crepuscular		NA	0	0	0	0	0	0	0	0
TWR	Dry	Apr.May	H04	Diurnal	2	24	2	0	1	1	2	0	0	0
TWR	Dry	Apr.May	H05	Diurnal		NA	0	0	0	0	0	0	0	0
TWR	Dry	Apr.May	H06	Diurnal	2	30	9	8	1	0	0	8	1	0
TWR	Dry	Apr.May	H07	Diurnal	1	34	1	1	0	0	0	1	0	0
TWR	Dry	Apr.May	H08	Diurnal		NA	0	0	0	0	0	0	0	0
TWR	Dry	Apr.May	H09	Diurnal	1	28	23	23	0	0	0	23	0	0
TWR	Dry	Apr.May	H10	Crepuscular		NA	0	0	0	0	0	0	0	0
TWR	Dry	Apr.May	H11	Nocturnal	1	24	1	0	1	0	0	1	0	0
TWR	Dry	Apr.May	H12	Nocturnal	1	25	1	0	1	0	0	0	1	0
TWR	Dry	Jun.Jul	H01	Nocturnal	1	25	13	0	13	0	0	0	13	0
TWR	Dry	Jun.Jul	H02	Nocturnal		NA	0	0	0	0	0	0	0	0
TWR	Dry	Jun.Jul	H03	Crepuscular	1	23	1	0	1	0	0	0	1	0
TWR	Dry	Jun.Jul	H04	Diurnal	4	23	52	0	4	48	2	48	2	0
TWR	Dry	Jun.Jul	H05	Diurnal	2	24	40	39	1	0	0	39	1	0
TWR	Dry	Jun.Jul	H06	Diurnal	1	27	1	0	1	0	0	0	1	0
TWR	Dry	Jun.Jul	H07	Diurnal		NA	0	0	0	0	0	0	0	0
TWR	Dry	Jun.Jul	H08	Diurnal		NA	0	0	0	0	0	0	0	0
TWR	Dry	Jun.Jul	H09	Diurnal	2	26	2	0	2	0	0	0	2	0
TWR	Dry	Jun.Jul	H10	Crepuscular	1	25	5	0	0	1	0	1	0	0
TWR	Dry	Jun.Jul	H11	Nocturnal		NA	0	0	0	0	0	0	0	0
TWR	Dry	Jun.Jul	H12	Nocturnal		NA	0	0	0	0	0	0	0	0
TWR	Dry	Aug.Sep	H01	Nocturnal	1	24	1	0	1	0	0	0	1	0
TWR	Dry	Aug.Sep	H02	Nocturnal		NA	0	0	0	0	0	0	0	0
TWR	Dry	Aug.Sep	H03	Crepuscular		NA	0	0	0	0	0	0	0	0
TWR	Dry	Aug.Sep	H04	Diurnal	3	24	5	0	5	0	0	0	5	0
TWR	Dry	Aug.Sep	H05	Diurnal		NA	0	0	0	0	0	0	0	0
TWR	Dry	Aug.Sep	H06	Diurnal	1	24	15	0	15	0	0	0	15	0
TWR	Dry	Aug.Sep	H07	Diurnal	1	24	37	0	37	0	0	0	37	0
TWR	Dry	Aug.Sep	H08	Diurnal	1	32	1	0	1	0	0	0	1	0
TWR	Dry	Aug.Sep	H09	Diurnal	3	27	47	37	10	0	0	37	10	0
TWR	Dry	Aug.Sep	H10	Crepuscular	2	27	22	20	2	0	0	20	2	0
TWR	Dry	Aug.Sep	H11	Nocturnal		NA	0	0	0	0	0	0	0	0
TWR	Dry	Aug.Sep	H12	Nocturnal	2	24	2	0	2	0	1	0	1	0
TWR	Wet	Oct.Nov	H01	Nocturnal	1	23	4	0	1	0	1	0	0	0
TWR	Wet	Oct.Nov	H02	Nocturnal		NA	0	0	0	0	0	0	0	0
TWR	Wet	Oct.Nov	H03	Crepuscular	1	22	4	4	0	0	0	0	4	0
TWR	Wet	Oct.Nov	H04	Diurnal	1	24	76	0	76	0	76	0	0	0
TWR	Wet	Oct.Nov	H05	Diurnal		NA	0	0	0	0	0	0	0	0
TWR	Wet	Oct.Nov	H06	Diurnal	2	25	2	0	2	0	1	0	1	0
TWR	Wet	Oct.Nov	H07	Diurnal	1	26	1	0	1	0	0	0	1	0
TWR	Wet	Oct.Nov	H08	Diurnal		NA	0	0	0	0	0	0	0	0
TWR	Wet	Oct.Nov	H09	Diurnal		NA	0	0	0	0	0	0	0	0
TWR	Wet	Oct.Nov	H10	Crepuscular		NA	0	0	0	0	0	0	0	0
TWR	Wet	Oct.Nov	H11	Nocturnal		NA	0	0	0	0	0	0	0	0
TWR	Wet	Oct.Nov	H12	Nocturnal		NA	0	0	0	0	0	0	0	0
